# Supplementary material for: Comparison of Fecal Collection Methods on Variation in Gut Metagenomics and Untargeted Metabolomics
Source: PubMed Central journal article supplement (PMC8550109; doi:10.1128/msphere.00636-21), 2021-09-15

A

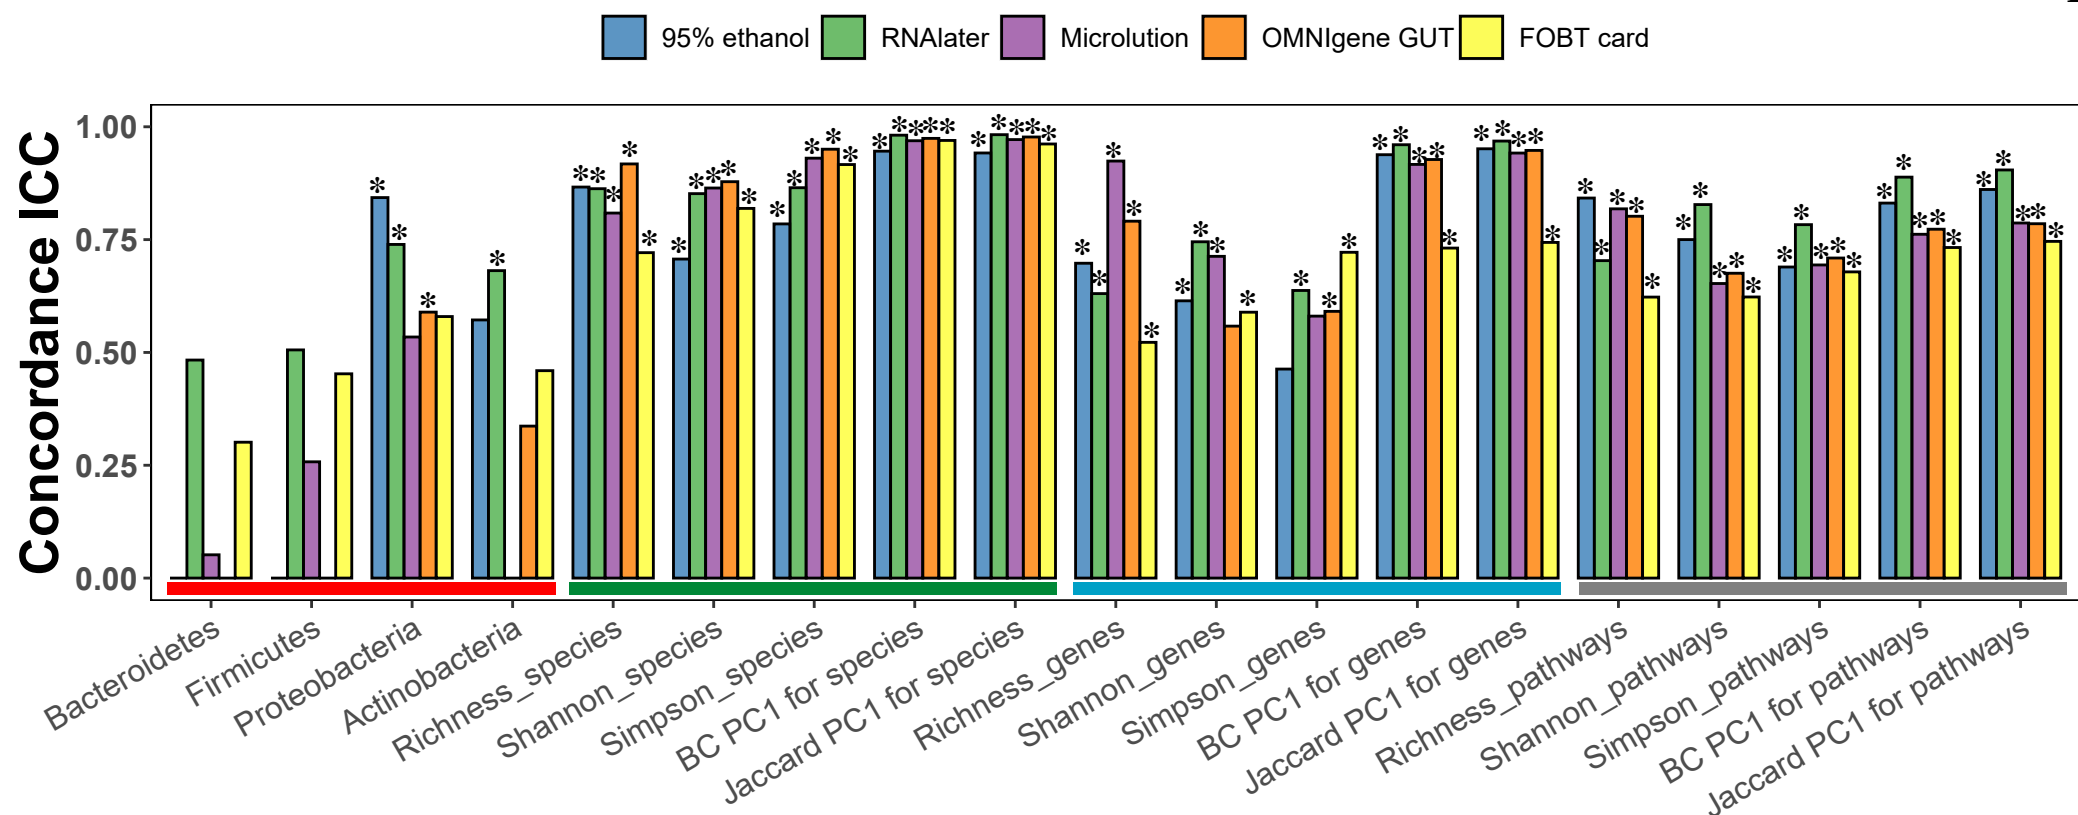

B

Species level  
inter-method(day 0 vs GS)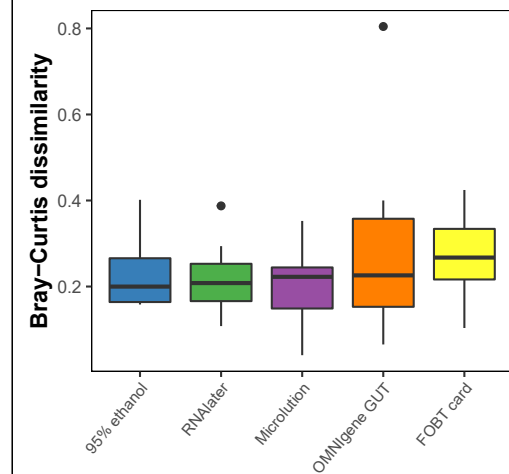

C

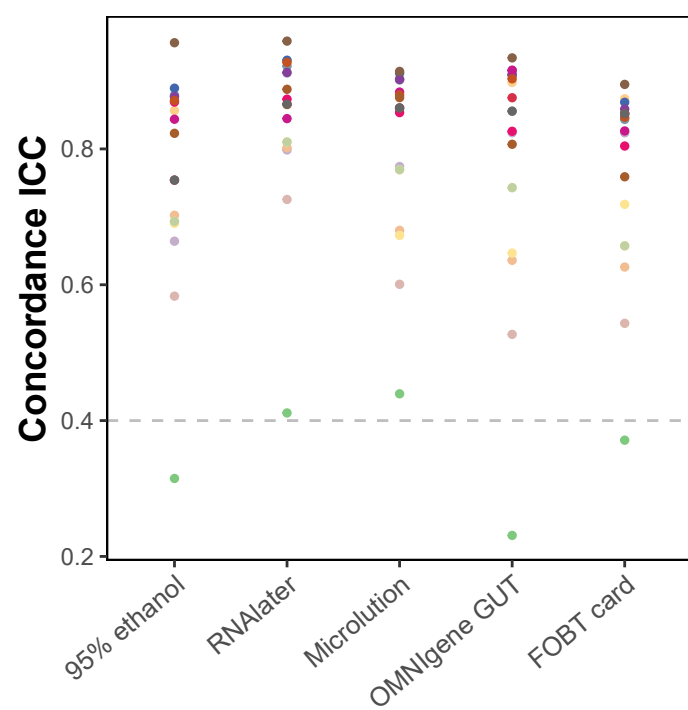

Top 20 pathways

- DTDPRHAMSYN-PWY: dTDP-L-rhamnose biosynthesis I
- ILEUSYN-PWY: L-isoleucine biosynthesis I (from threonine)
- PEPTIDOGLYCANSYN-PWY: peptidoglycan biosynthesis I (meso-diaminopimelate containing)
- PWY-1042: glycolysis IV (plant cytosol)
- PWY-2942: L-lysine biosynthesis III
- PWY-5097: L-lysine biosynthesis VI
- PWY-5686: UMP biosynthesis
- PWY-5695: urate biosynthesis/inosine 5'-phosphate degradation
- PWY-6122: 5-aminoimidazole ribonucleotide biosynthesis II
- PWY-6277: superpathway of 5-aminoimidazole ribonucleotide biosynthesis
- PWY-6385: peptidoglycan biosynthesis III (mycobacteria)
- PWY-6386: UDP-N-acetylmuramoyl-pentapeptide biosynthesis II (lysine-containing)
- PWY-6387: UDP-N-acetylmuramoyl-pentapeptide biosynthesis I (meso-diaminopimelate containing)
- PWY-6609: adenine and adenosine salvage III
- PWY-6700: queuosine biosynthesis
- PWY-7111: pyruvate fermentation to isobutanol (engineered)
- PWY-7219: adenosine ribonucleotides de novo biosynthesis
- PWY-7221: guanosine ribonucleotides de novo biosynthesis
- TRNA-CHARGING-PWY: tRNA charging
- VALSYN-PWY: L-valine biosynthesis

D

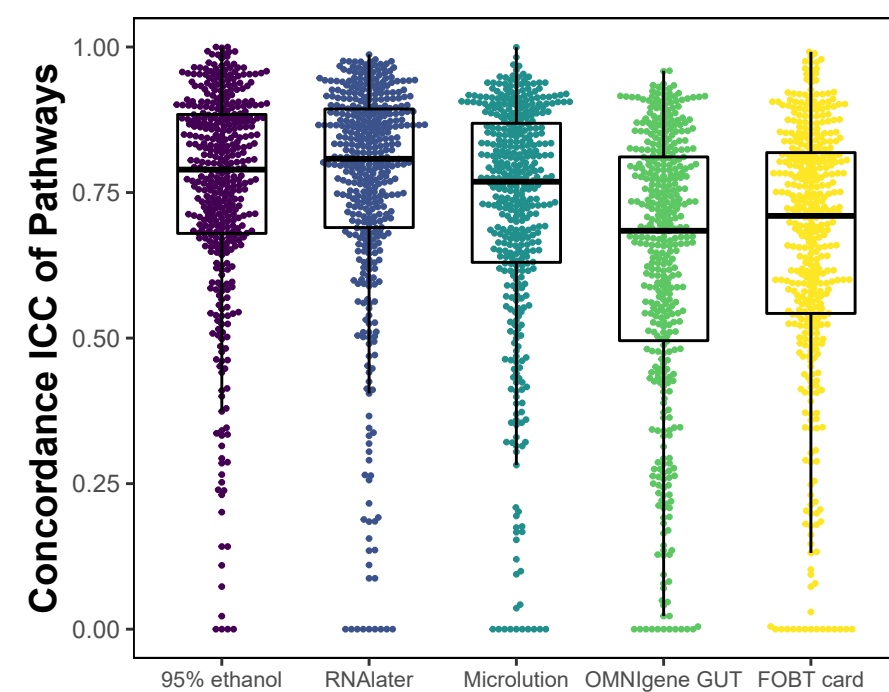

E

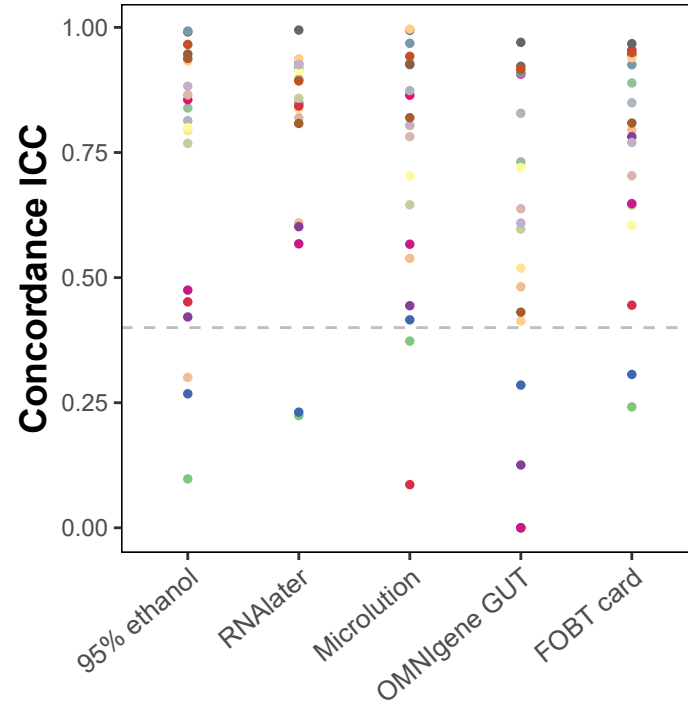

Top 20 resistance genes

- ARO:3000190 [tetO] Campylobacter jejuni
- ARO:3000191 [tetQ] Bacteroides fragilis
- ARO:3000196 [tet32] Escherichia coli
- ARO:3000237 [TolC] Escherichia coli
- ARO:3000263 [marA] Escherichia coli str. K-12 substr. W3110
- ARO:3000375 [ErmB] Enterococcus faecium Partial
- ARO:3000412 [sul2] Vibrio cholerae
- ARO:3000498 [ErmF] Bacteroides fragilis
- ARO:3000516 [emrR] Escherichia coli str. K-12 substr. MG1655
- ARO:3000518 [CRP] Escherichia coli str. K-12 substr. W3110
- ARO:3000522 [ErmG] Bacteroides thetaiotaomicron
- ARO:3000567 [tet(40)] uncultured bacterium
- ARO:3002597 [AAC(6)-Ie-APH(2'')-Ia] Staphylococcus aureus
- ARO:3002660 [APH(6)-Id] Pseudomonas aeruginosa
- ARO:3002837 [InuC] Streptococcus agalactiae
- ARO:3002867 [dfrF] Enterococcus faecalis
- ARO:3002999 [CblA-1] mixed culture bacterium AX\_gF3SD01\_15
- ARO:3003550 [mdtP] Escherichia coli str. K-12 substr. W3110
- ARO:3004659 [Mef(En2)] Bacteroides fragilis
- ARO:3004683 [aadS] Transposon Tr4551

F

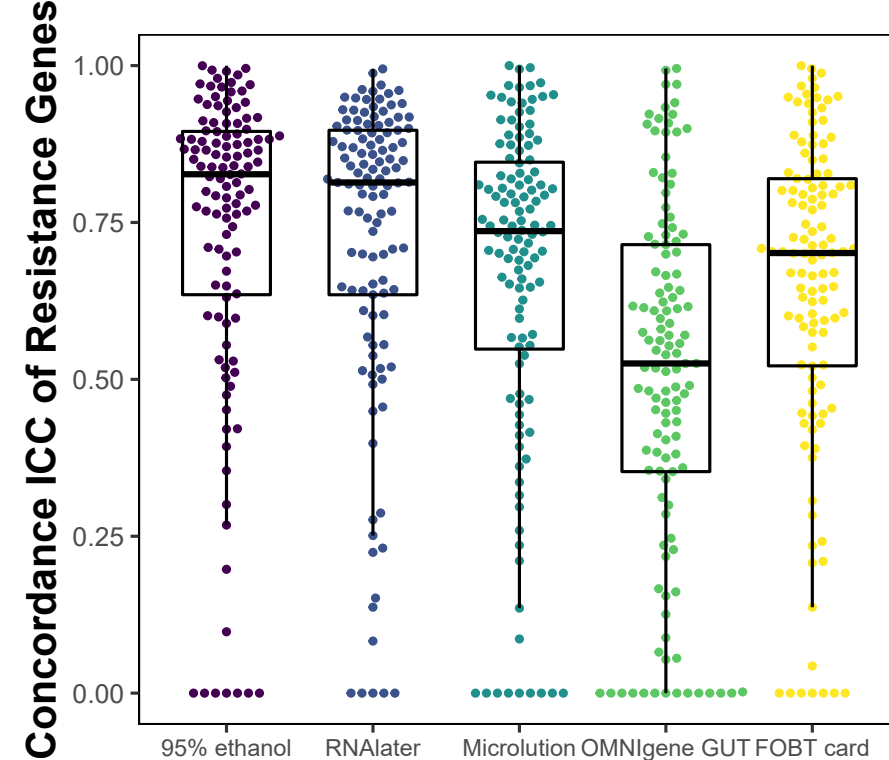

Supplement: msphere.00636-21-sf003.pdf [file msphere.00636-21-sf003.pdf]
