# Supplementary material for: Comparison of Fecal Collection Methods on Variation in Gut Metagenomics and Untargeted Metabolomics
Source: PubMed Central journal article supplement (PMC8550109; doi:10.1128/msphere.00636-21), 2021-09-15
Supplement: msphere.00636-21-s0001.pdf [file msphere.00636-21-s0001.pdf]

## Document project information

|                            |                          |
|----------------------------|--------------------------|
| Application number         | Application date         |
| CN201710429297.7           | 2017-06-08               |
| Open (announcement) number | Open (announcement) date |
| CN107034141A               | 2017-08-11               |

classification codes  
C12N1/04(2006.01)I

**【Applicant】**

Shenzhen micro health gene technology co., LTD

**【Inventor】**

Zhenyu Yang, Wenkui Dai, Qian Zhou, et al.

**【Agent】**

Shenzhen micro health gene technology co., LTD

**【Agency】**

Beijing kuai wisdom intellectual property agency co., LTD

**【Address】**

No.1803, Jin Hecheng Investment Building, Wuhe Avenue, Bantian Street, Longgang District, Shenzhen City, Guangdong Province, China

**【Claim】**

Microolution is a relatively new stool collection kit, designed for the collection and preservation of the intestinal flora of fecal samples. Material components per every 1000 mL Microolution fixative include 400~600 mmol Tris-HCl, 3~7 mol NaCl, 50~150 mmol EDTA and/or EDTA-Na<sub>2</sub>, and 1~3 mol ethanol; the balance is water.

# Protocol of Microlution

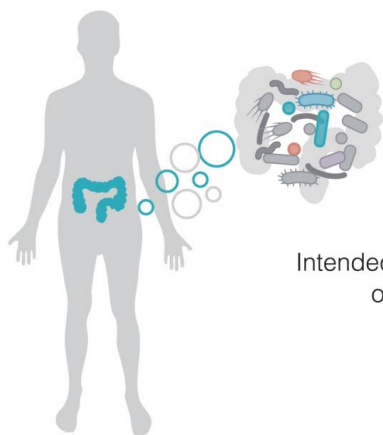

For In Vitro Diagnostic Use  
Contains 1 collection kit

Intended for the collection and stabilization  
of microbial DNA from fecal sample.

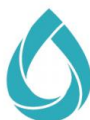

## Microlution Sampling Instructions

### 4 Simple Steps to Sample

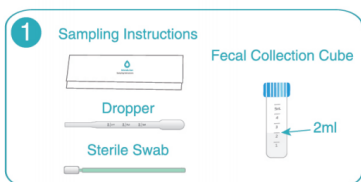

#### Get Ready:

- Check the package: Sampling Instructions, Dropper, Sterile Swab, Fecal Collection Tube;
- Fecal Collection Tube with 2ml liquid;
- Remove the lid from fecal collection tube, but keep it nearby;

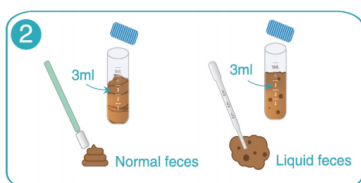

#### Sampling: (Collect from the middle of the feces)

- If normal feces, please collect with swab;
- If liquid feces, please collect with dropper;
- Collect enough samples to make sure the liquid level reaches the mark '3 ml';

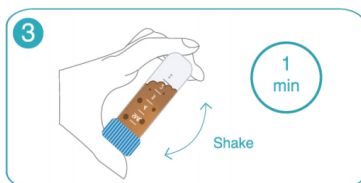

#### Shake:

- Tightly replace the lid;
- Shake the tube about 1 minute;

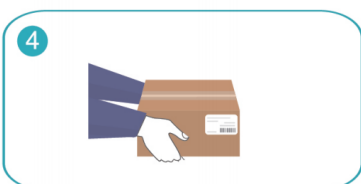

#### Send:

- Hand the tube to the lab staff  
OR
- Place the tube in a mailer; Drop the mailer in any mailbox;

## Notices

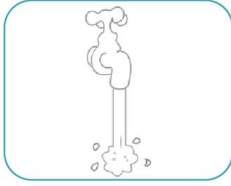

- Keep the reagents away from children;
- In case of contact with eyes or skin, please rinse with clear water;

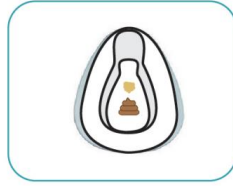

- Recommended disposable potty;
- Keep away from the surfaces of potty and avoid contamination with debris and urine;

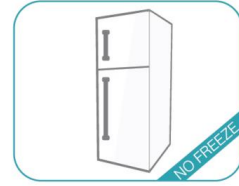

- Do not freeze;
- Place in room temperature or refrigerate with 4°C (39.2°F)
