# Supplementary material for: Comparison of Fecal Collection Methods on Variation in Gut Metagenomics and Untargeted Metabolomics
Source: PubMed Central journal article supplement (PMC8550109; doi:10.1128/msphere.00636-21), 2021-09-15

A

95% ethanol RNAlater Microlution OMNIgene GUT FOBT card

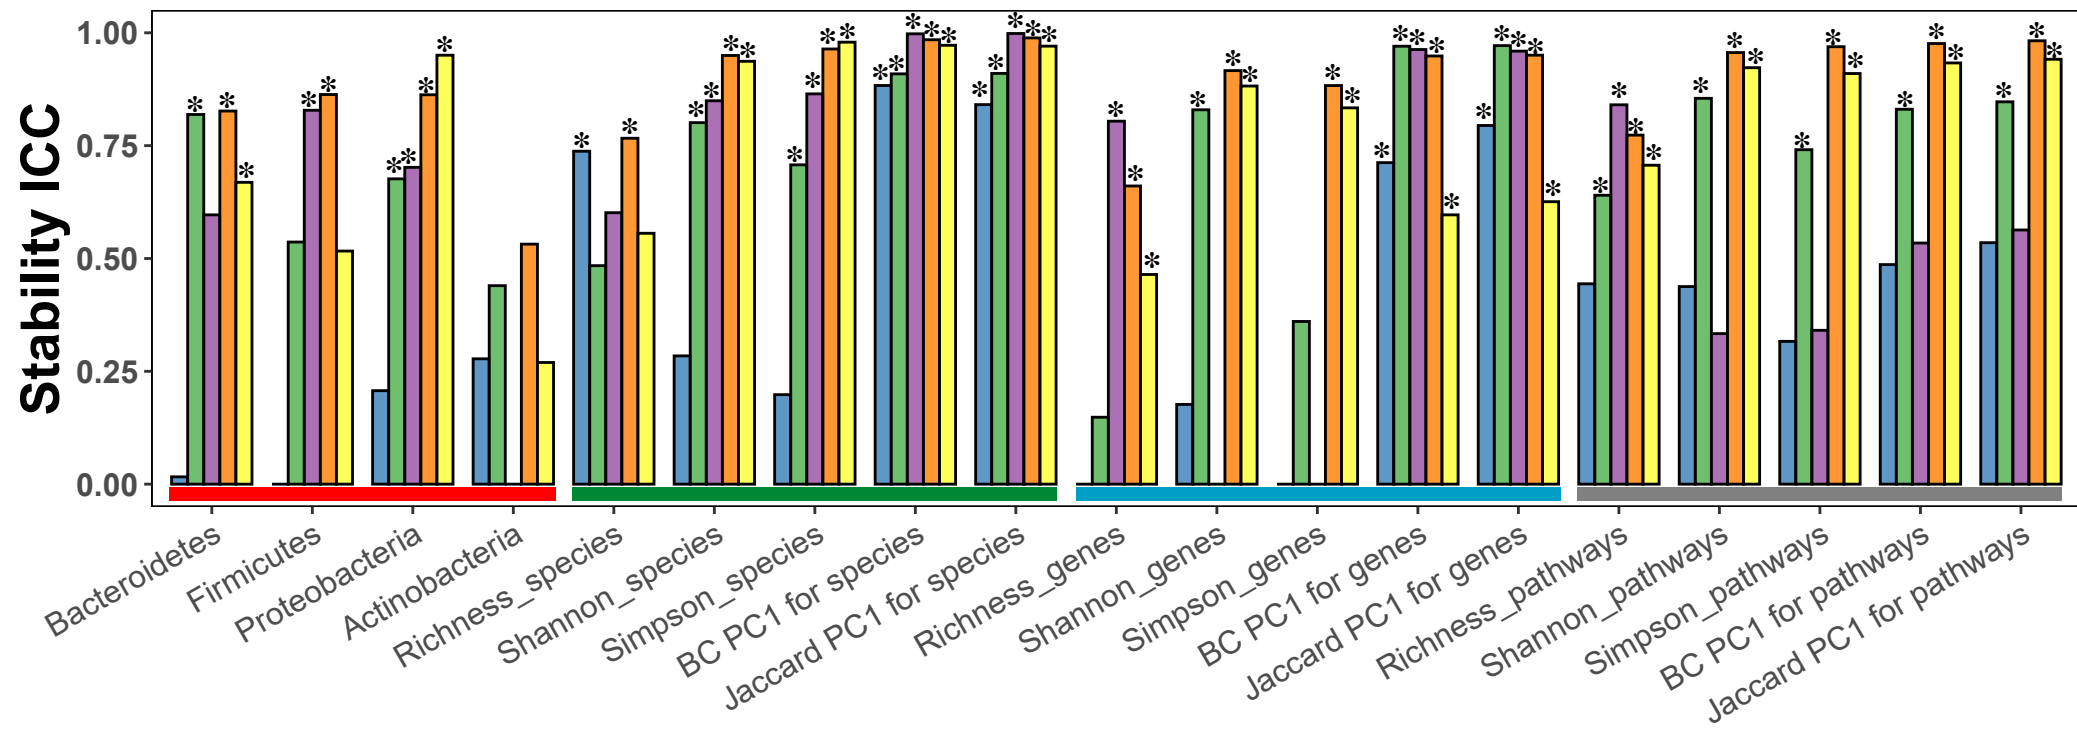

B

Species level  
intra-method(day 0 vs day 4)

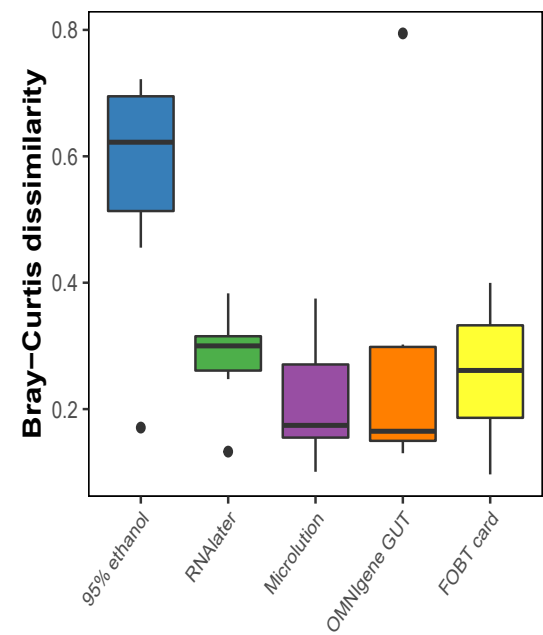

C

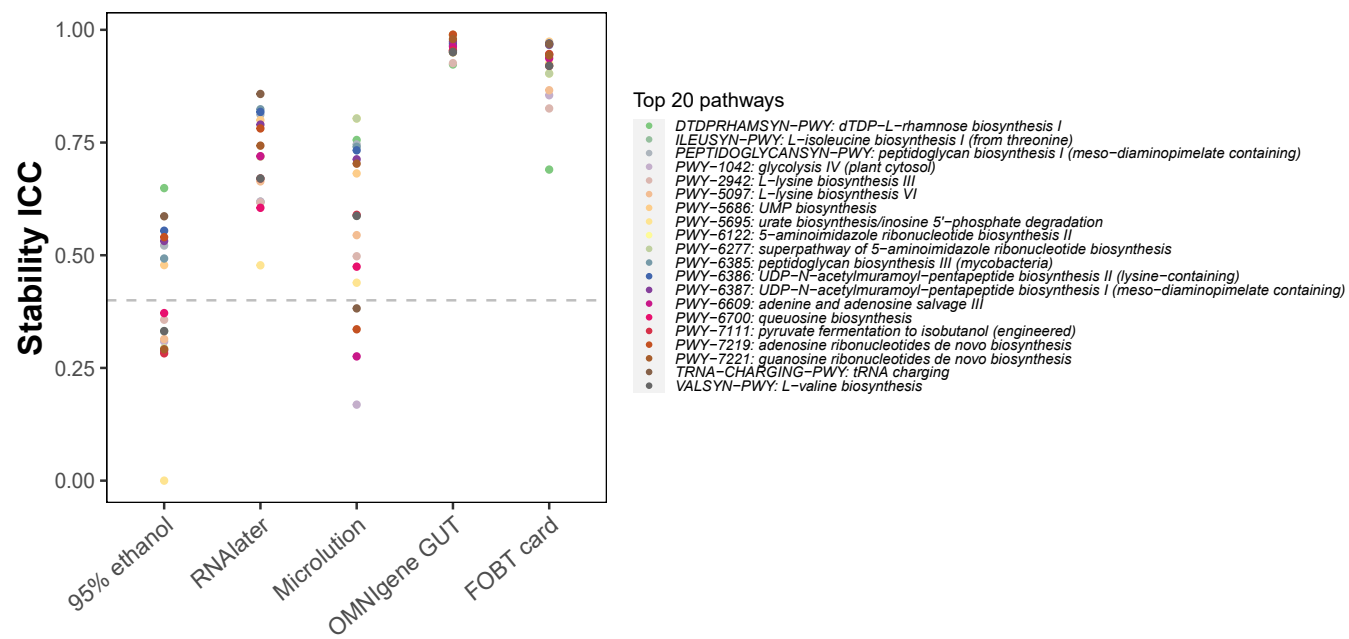

D

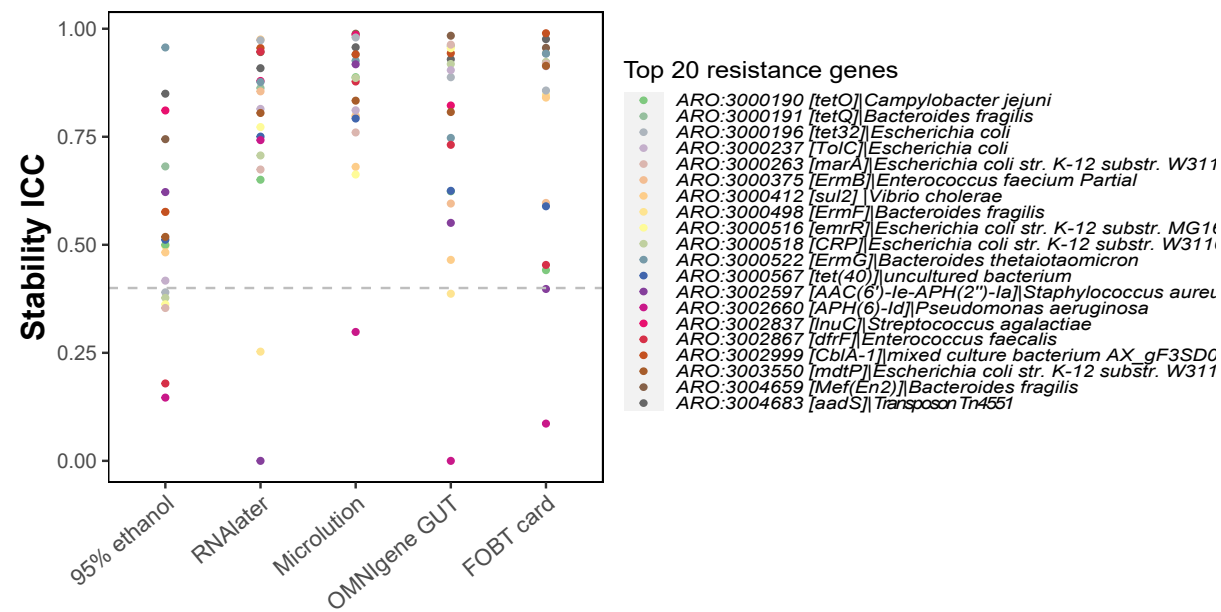

E

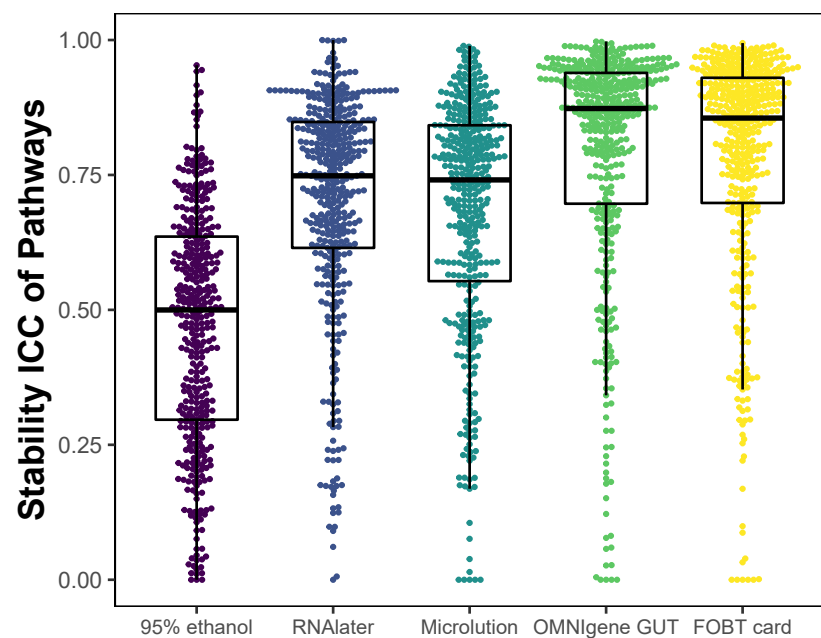

F

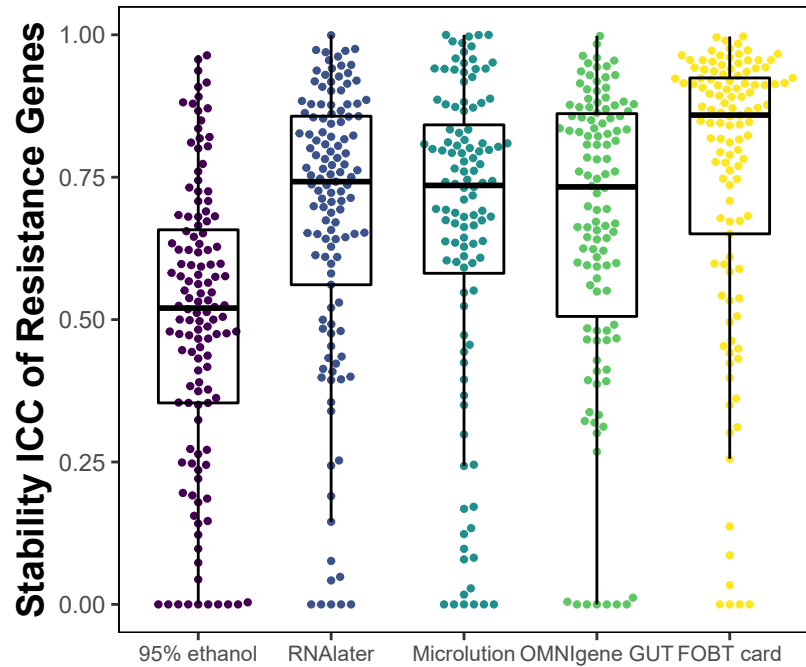

Supplement: msphere.00636-21-sf002.pdf [file msphere.00636-21-sf002.pdf]
