# Supplementary material for: Comparison of Fecal Collection Methods on Variation in Gut Metagenomics and Untargeted Metabolomics
Source: PubMed Central journal article supplement (PMC8550109; doi:10.1128/msphere.00636-21), 2021-09-15

Reliability ICC

95% ethanol RNAlater Microolution OMNIgene GUT

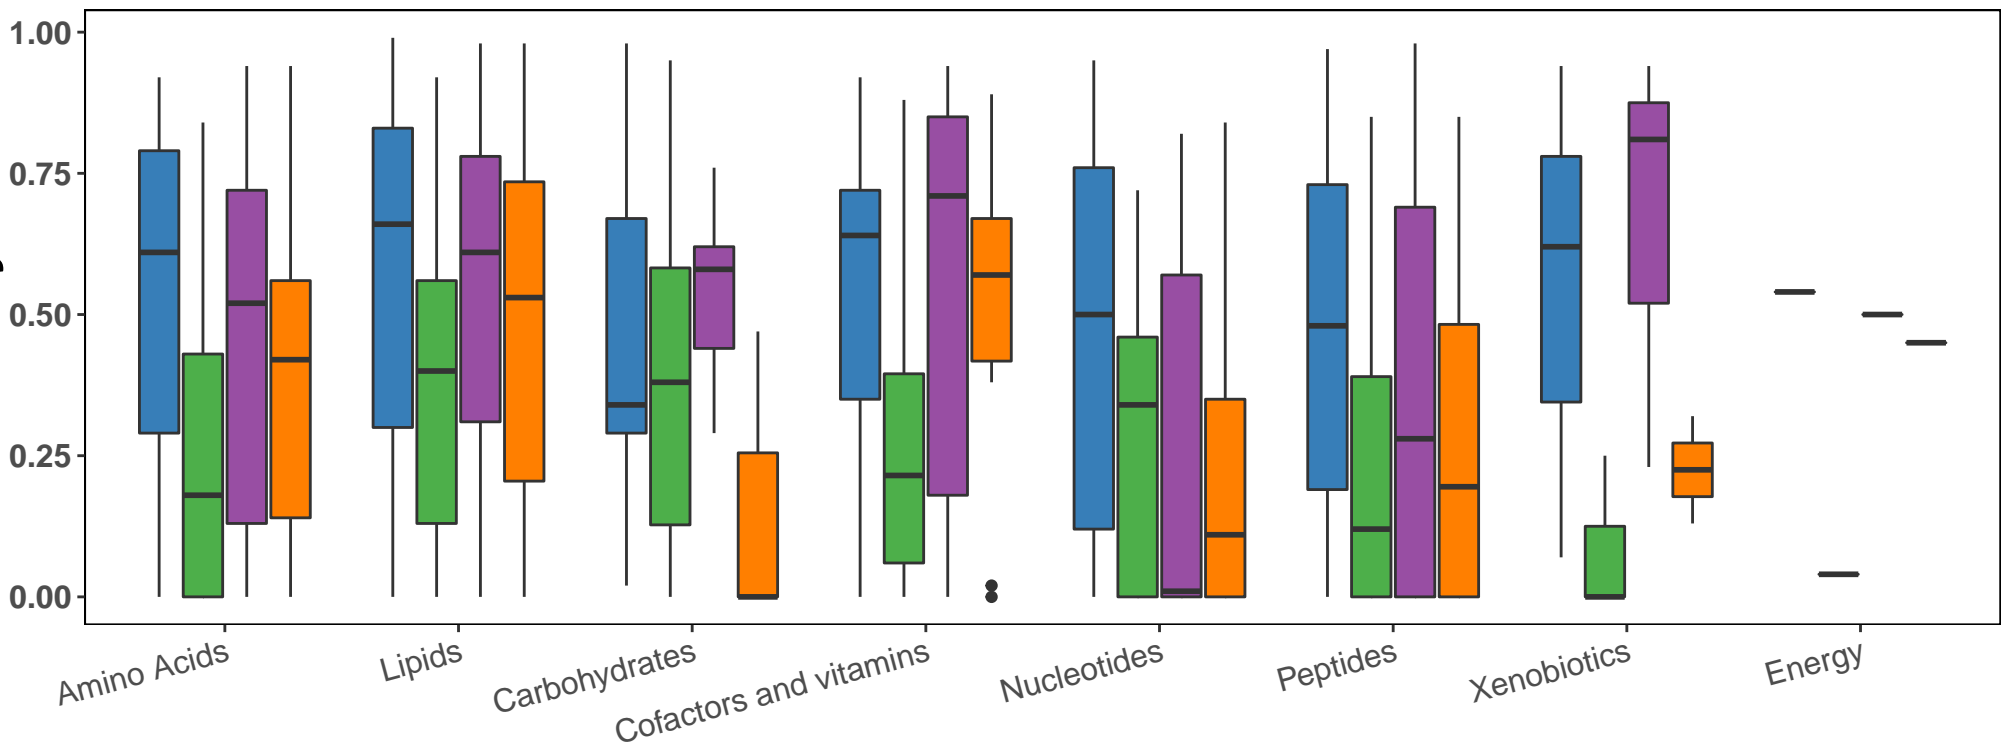

Supplement: msphere.00636-21-sf007.pdf [file msphere.00636-21-sf007.pdf]
